# Supplementary material
Source: PubMed Central journal article supplement (PMC1634931)

Fig. A1

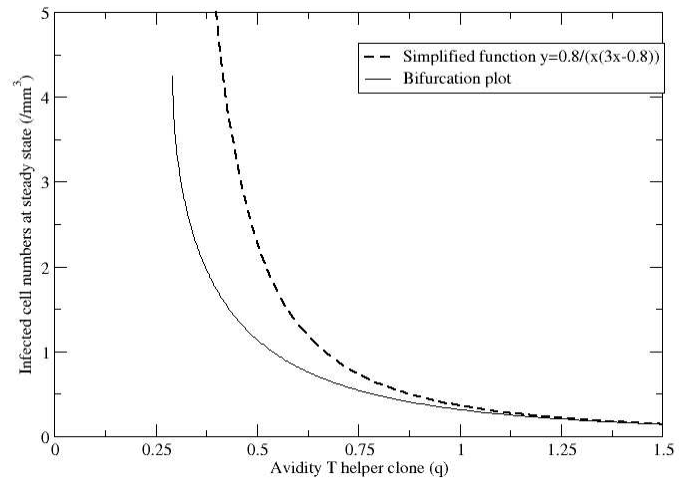

Fig. A2:

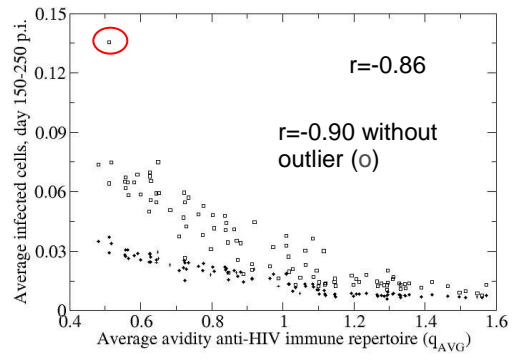

Fig. A3:

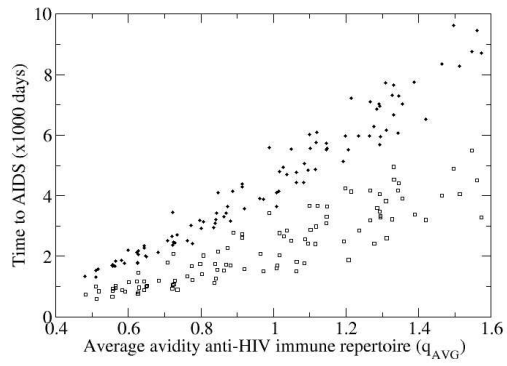

Fig. A4:

1. Lysis depends on avidity

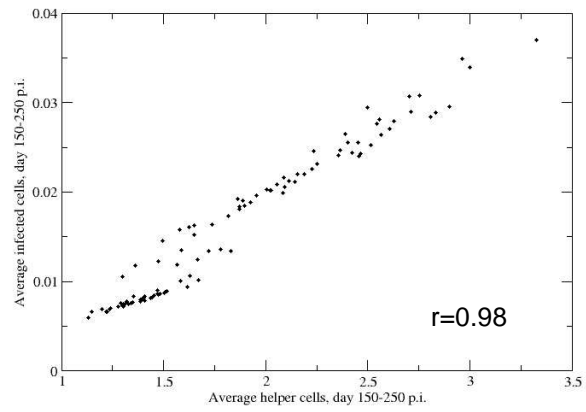

2. Lysis is independent of avidity

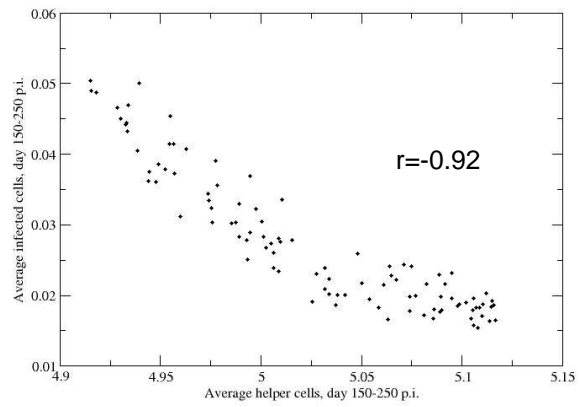

Supplement: rspb20063511s05.pdf [file rspb20063511s05.pdf]
